# Supplementary material
Source: publisher figshare collection journal article supplement (https://springernature.figshare.com/ndownloader/files/22420485)

Additional File 3: Graphical Visualization of Key Findings

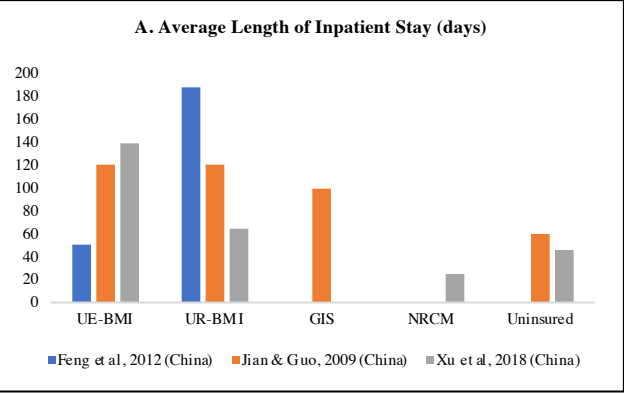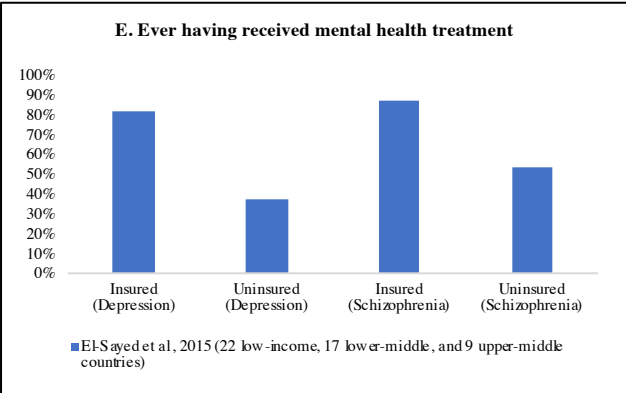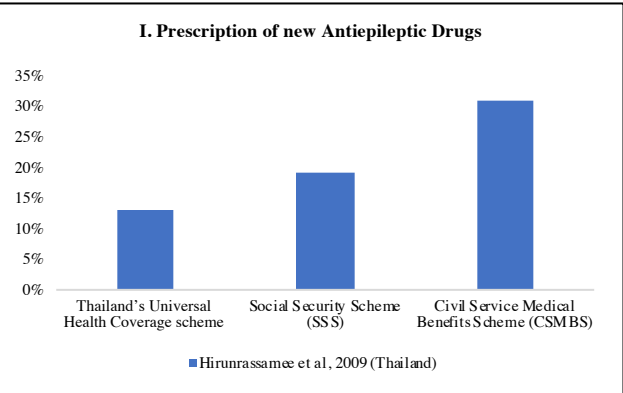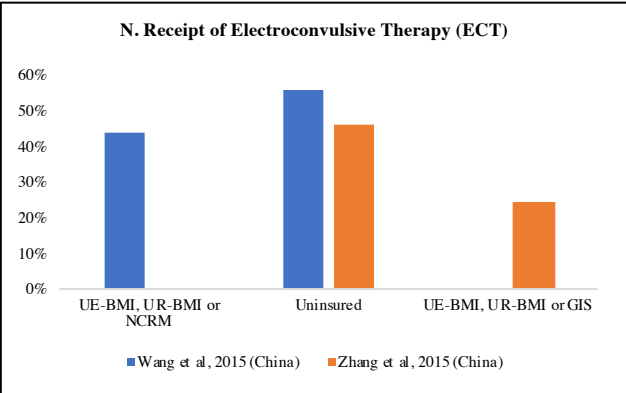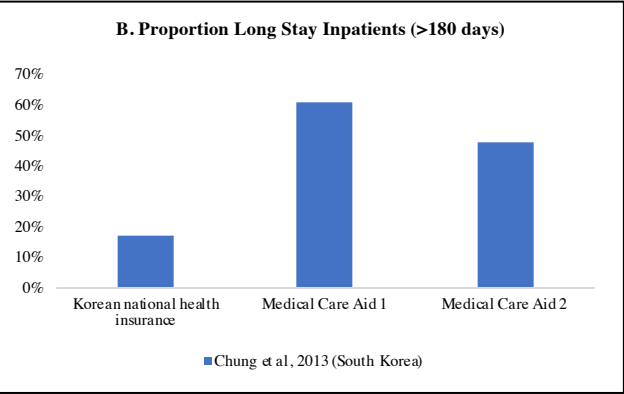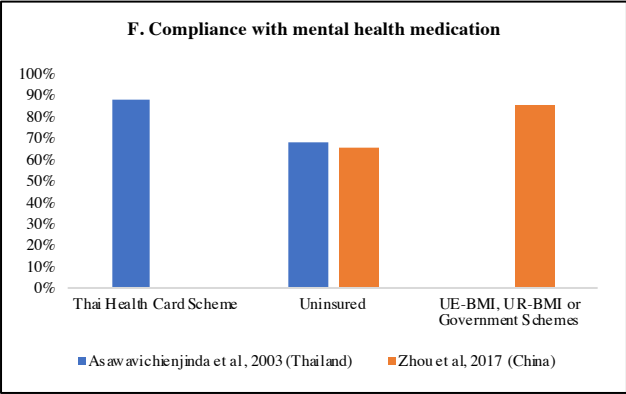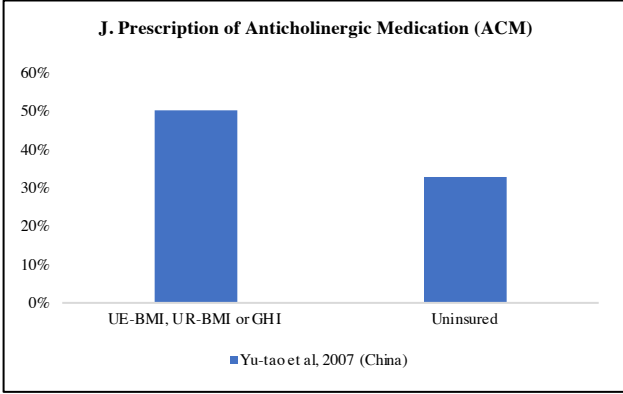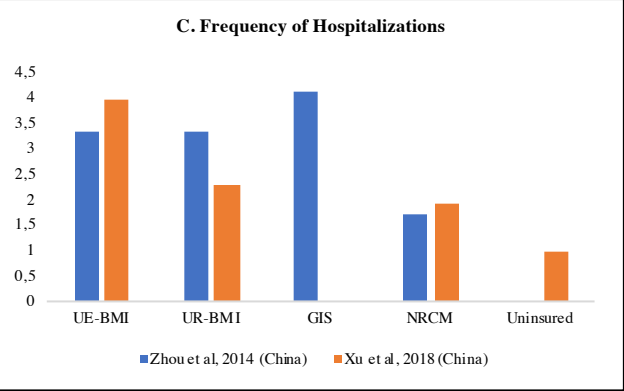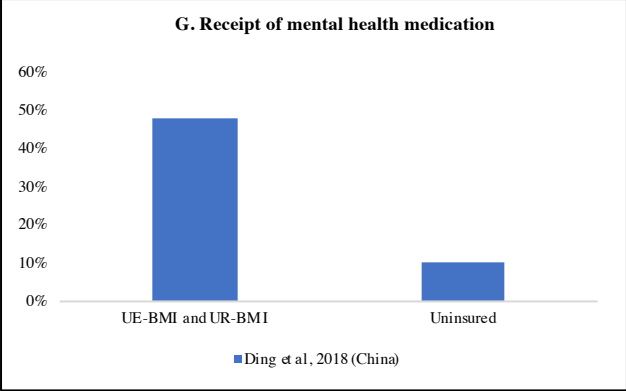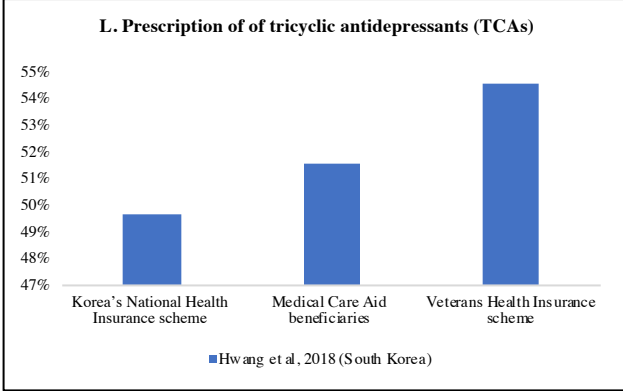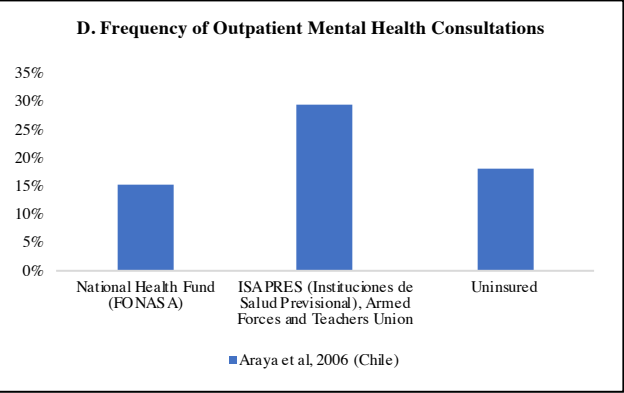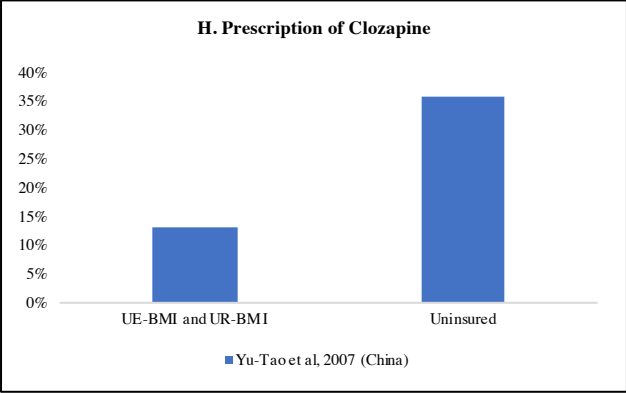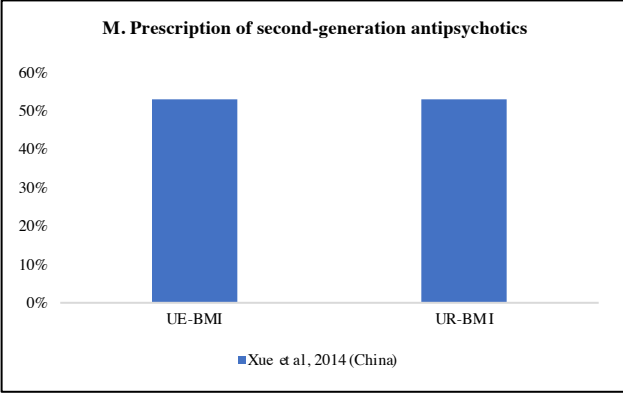

Supplement: Supplementary file [file 22420485]
